# Supplementary material
Source: publisher site journal article supplement (https://www.dovepress.com/get_supplementary_file.php?f=332434.xlsx)
Supplement: Supplementary file 1 [file get_supplementary_file.php]

## Sheet: Extracted data info
Patient #	Country/Region	Country/region	NTM type	Treatment	Outcome	Diagnostic method	Source
1	F	China	M. abscessus	Clarithromycin, Linezolid, Imipenem, Rifampicin, Ethambutol, Cefoxitin, Azithromycin, Moxifloxacin, Cefprozil	N	Bronchoscopy, acid-fast bacilli found in bronchoalveolar lavage fluid (BALF) and gastric aspirate by Ziehi-Neelsen staining. both tuberculin skin test and interferon gamma (IFN-γ) release assays were negative, mycobacterial liquid cultures of bronchoalveolar lavage and gastric aspirate were positive at 118 and 86 hrs of culture, respectively	Liu H, Dong F, Liu J, et al. Successful management of Mycobacterium abscessus complex lung disease in an otherwise healthy infant. Infect Drug Resist. 2019;12:1277‐1283. Published 2019 May 15. doi:10.2147/IDR.S198461
2	M	Kuwait (Middle East)	M. abscessus	Amikacin, Ciprofloxacin, Clarithromycin	N	respiratory secretions, culture grew AFB	Jamal W, Salama MF, Al Hashem G, et al. An outbreak of Mycobacterium abscessus infection in a Pediatric Intensive Care Unit in Kuwait. Pediatr Infect Dis J. 2014;33(3):e67-e70. doi:10.1097/INF.0000000000000071
3	F	Kuwait (Middle East)	M. abscessus	Amikacin, Ciprofloxacin, Clarithromycin	N	respiratory secretions, culture grew AFB	Jamal W, Salama MF, Al Hashem G, et al. An outbreak of Mycobacterium abscessus infection in a Pediatric Intensive Care Unit in Kuwait. Pediatr Infect Dis J. 2014;33(3):e67-e70. doi:10.1097/INF.0000000000000071
4	M	United States	M. abscessus	Cefoxitin, Meropenem, Amikacin, Clarithromycin	N	BAL revealed M. abscessus complex	Do PC, Nussbaum E, Moua J, Chin T, Randhawa I. Clinical significance of respiratory isolates for Mycobacterium abscessus complex from pediatric patients. Pediatr Pulmonol. 2013;48(5):470-480. doi:10.1002/ppul.22638
5	N/A	United States	M. abscessus	None	N	sporadic MAB cultures from tracheal aspirates	Do PC, Nussbaum E, Moua J, Chin T, Randhawa I. Clinical significance of respiratory isolates for Mycobacterium abscessus complex from pediatric patients. Pediatr Pulmonol. 2013;48(5):470-480. doi:10.1002/ppul.22638
6	F	United States	M. abscessus	Isoniazid, Rifampicin	-	Gastric, BAL for culture	Lai KK, Brown BA, Westerling JA, Fontecchio SA, Zhang Y, Wallace RJ Jr. Long-term laboratory contamination by Mycobacterium abscessus resulting in two pseudo-outbreaks: recognition with use of random amplified polymorphic DNA (RAPD) polymerase chain reaction. Clin Infect Dis. 1998;27(1):169-175. doi:10.1086/514635
7	F	Australia	M. avium	Azithromycin, Rifampicin, Ethambutol	N	TST (20mm), Interferon Gamma Release Assay (QuantiFERON-TB Gold) (IGRA) negative, bronchial lavage showed no acid-fast bacilli on Ziehl-Neelsen stain, no malignant cells, and mycobacterial cultures were negative. thoracoscopic biopsy: PCR identifying M avium	Shanthikumar S, Lwin T, Chow CW, Crameri J, Harrison J. A toddler with a cough and wheeze refractory to treatment. Thorax. 2017 Oct;72(10):953-955. doi: 10.1136/thoraxjnl-2016-209915. Epub 2017 Apr 3. PMID: 28373347.
8	M	Spain	M. avium	None	N	bronchoscopy, sample biopsy (revealing necrotizing granulomatous inflammation but no mycobacterial organisms were demonstrated histologically by way of acid-fast stain), Bacterial, fungal, virus, and mycobacterial cultures were done; all of which were negative, morning gastric aspirate, tuberculin skin test, and Quantiferon1 test all negative. rigid bronchoscope and culture. no susceptibility tes…	del Rio Camacho G, Soriano Guillén L, Flandes Aldeyturriaga J, Hernández García B, Bernácer Borja M. Endobronchial atypical mycobacteria in an immunocompetent child. Pediatr Pulmonol. 2010 May;45(5):511-3. doi: 10.1002/ppul.21194. PMID: 20425861.
9	M	Germany	M. avium	Ethambutol, Rifampicin, Azithromycin	N	Bronchoscopy, sheared off & Histology	Kröner C, Griese M, Kappler M, Schoen C, Hoffmann F, Nicolai T, Reiter K. Endobronchial lesions caused by nontuberculous mycobacteria in apparently healthy pediatric patients. Pediatr Infect Dis J. 2015 May;34(5):532-5. doi: 10.1097/INF.0000000000000606. PMID: 25478650.
10	F	Germany	M. avium	Ethambutol, Rifampicin, Clarithromycin, Levofloxacin	N	Bronchoscopy, BAL, microbial culture and molecular pathological examination.	Kröner C, Griese M, Kappler M, Schoen C, Hoffmann F, Nicolai T, Reiter K. Endobronchial lesions caused by nontuberculous mycobacteria in apparently healthy pediatric patients. Pediatr Infect Dis J. 2015 May;34(5):532-5. doi: 10.1097/INF.0000000000000606. PMID: 25478650.
11	F	Belgium	M. avium	Rifampicin, Isoniazid, Pyrazinamide	N	Mantoux test (PPD-S, 2 IU) negative. rigid bronchoscopy: no acid-fast bacilli were seen. Cultures from three gastric aspirates and bronchial tissue remained negative after 2 months. A differential Mantoux test performed 3 months later showed no induration in response to PPD-S but 8 mm induration to avian tuberculin (PPD-A, Mycobacterium avium Sensitin RS 10, 0.1 lg, Statens Seruminstitut Copenhag…	Tuerlinckx D, Bodart E, Lacrosse M, de Bilderling G. Pulmonary disease possibly caused by Mycobacterium avium in an HIV-negative infant. Eur J Pediatr. 2000;159(3):225‐226. doi:10.1007/s004310050058
12	M	Japan	M. avium	Cefmetazole, Netilmicin	N	PPD negative, no pathological microbes from lavage fluids. Open lung biopsy and culture.	Ohga S, Ikeuchi K, Kadoya R, et al. Intrapulmonary Mycobacterium avium infection as the first manifestation of chronic granulomatous disease. J Infect. 1997;34(2):147‐150. doi:10.1016/s0163-4453(97)92509-3
13	M	France	M. avium complex	Clarithromycin, Rifampicin, Ethambutol	N	Bronchoscopy, Haematein–Eosin–Safran-stained tissue sections revealed a necrotising granulomatous inflammation; acid-fast staining showed no mycobacterial organism. liquid culture medium, then identification by PCR identified MAC. Bacterial, fungal and viral cultures were carried out, all of which were negative. TB testing was all negative (morning gastric aspirates, TST, and QuantiFERON test.)	Perisson C, Nathan N, Thierry B, Corvol H. Endobronchial avium mycobacteria infection in an immunocompetent child. BMJ Case Rep. 2013 Nov 19;2013:bcr2013200776. doi: 10.1136/bcr-2013-200776. PMID: 24252838; PMCID: PMC3841433.
14	F	United States	M. avium complex	None	N	thoracotomy, AFB culture	Lewis CR, Carroll V. Not all that wheezes is asthma. Clin Pediatr (Phila). 2014;53(7):708‐709. doi:10.1177/0009922814526989
15	F	Australia	M. avium complex	Clarithromycin, Rifampicin, Ethambutol, IFN-gamma, Moxifloxacin, Linezolid, Amikacin	N	Mantoux skin test (7mm), Bronchoscopy: biopsy and bronchoalveolar lavage cultures grew MAC	Auld B, Urquhart D, Walsh M, Nourse C, Harris MA. Blurring the lines in interferon {gamma} receptor deficiency: an infant with near-fatal airway disease. Pediatrics. 2011;127(5):e1352‐e1355. doi:10.1542/peds.2010-0387
16	F	United States	M. avium complex	Clarithromycin, Rifabutin	N	(PPD) tuberculin test: 14x15 mm. Broncheoalveolar lavage fluid shows 3 granulocytes with negative fungal, acid-fast bacillus, and Gram stains.	Eneli I, West M, Sigal Y, et al. Index of suspicion. Pediatr Rev. 2006;27(10):389‐394. doi:10.1542/pir.27-10-389
17	N/A	France	M. avium complex	Isoniazid, Rifampicin	N	PPD (8mm), gastric and broncho- alveolar lavage specimens and bronchoscopic biopsies	Levrey-Hadden H, Reix P, Louis D, Bellon G. Non-tuberculous mycobacterial lung infection mimicking primary tuberculosis in non-immunocompromised children. Acta Paediatr. 2002;91(6):725‐726. doi:10.1111/j.1651-2227.2002.tb03313.x
18	N/A	France	M. avium complex	Isoniazid, Rifampicin, Ethambutol, Ethionamide, Clofazimine, Amikacin	N	PPD (10mm); cultures of the tissue biopsies, gastric and bronchoalveolar lavage samples	Levrey-Hadden H, Reix P, Louis D, Bellon G. Non-tuberculous mycobacterial lung infection mimicking primary tuberculosis in non-immunocompromised children. Acta Paediatr. 2002;91(6):725‐726. doi:10.1111/j.1651-2227.2002.tb03313.x
19	F	United States	M. avium complex	Rifabutin, Clarithromycin	N	PPD negative; biopsy and culture	Osorio A, Kessler RM, Guruprasad H, Isaacson G. Isolated intrathoracic presentation of Mycobacterium avium complex in an immunocompetent child. Pediatr Radiol. 2001;31(12):848‐851. doi:10.1007/s002470100003
20	F	United States	M. avium complex	Rifabutin, Clarithromycin, Ciprofloxacin, Clofazimine, Amikacin, Ethambutol, Glucocorticoids	N	PPD skin test (15 mm), gastric aspirates negative for AFB but positive for MAC. BAL fluid revealed AFB with cultures positive for MAC.	Piedimonte G, Wolford ET, Fordham LA, Leigh MW, Wood RE. Mediastinal lymphadenopathy caused by Mycobacterium avium-intracellulare complex in a child with normal immunity: successful treatment with anti-mycobacterial drugs and laser bronchoscopy. Pediatr Pulmonol. 1997;24(4):287‐291. doi:10.1002/(sici)1099-0496(199710)24:4<287::aid-ppul8>3.0.co;2-h
21	F	United States	M. avium complex	Isoniazid, Rifampicin, Pyrazinamide	N	Bronchoscopy, stains from biopsy negative for bacteria, fungi, and mycobacteria. cultures eventually grew MAC. acid-fast stains were negative. TST (greater than 10mm), candida skin test also positive.	Gupta SK, Katz BZ. Intrathoracic disease associated with Mycobacterium avium-intracellulare complex in otherwise healthy children: diagnostic and therapeutic considerations. Pediatrics. 1994;94(5):741‐742.
22	F	United States	M. avium complex	Azithromycin	N	Bronchoscopy and biopsy, TST (9 mm)	Freeman AF, Olivier KN, Rubio TT, et al. Intrathoracic nontuberculous mycobacterial infections in otherwise healthy children. Pediatr Pulmonol. 2009;44(11):1051-1056. doi:10.1002/ppul.21069
23	M	United States	M. avium complex	Rifampicin, Clarithromycin, Ethambutol, Prednisone	N	TST (20mm), bronchoscopy	Freeman AF, Olivier KN, Rubio TT, et al. Intrathoracic nontuberculous mycobacterial infections in otherwise healthy children. Pediatr Pulmonol. 2009;44(11):1051-1056. doi:10.1002/ppul.21069
24	M	United States	M. avium complex	Clarithromycin, Ethambutol, Rifabutin	N	Thoracoscopic lymph node biopsy showed granulomatous inflammation with central necrosis; stains for acid-fast bacilli were positive. TST was nonreactive and PCR for tuberculosis was negative.	Freeman AF, Olivier KN, Rubio TT, et al. Intrathoracic nontuberculous mycobacterial infections in otherwise healthy children. Pediatr Pulmonol. 2009;44(11):1051-1056. doi:10.1002/ppul.21069
25	M	United States	M. avium complex	rifampin and isoniazid, prednisone	N	An intermediate strength PPD-T (Aplisol, Parke, Davis & Co.) resulted in Ii mm of induration at 48 hours. Bronchoscopy. cultures of the endobronchial biopsy and gastric aspirates grew	Powell DA, Walker DH. Nontuberculous mycobacterial endobronchitis in children. J Pediatr. 1980 Feb;96(2):268-70. doi: 10.1016/s0022-3476(80)80822-5. PMID: 7351593.
26	M	United States	M. avium complex	Azithromycin, Ciprofloxacin	N	bronchoscopy. Histology showed granulation tissue with necrosis; acid-fast bacilli were present. A 5-tuberculin unit skin test, performed while the child was on steroids, was negative. Collection of only 1 morning gastric aspirate was completed	Nolt D, Michaels MG, Wald ER. Intrathoracic disease from nontuberculous mycobacteria in children: two cases and a review of the literature. Pediatrics. 2003;112(5):e434. doi:10.1542/peds.112.5.e434
27	F	Germany	M. chelonae	Ethambutol, Rifampicin, Clarithromycin	N	bronchoscopy. Acid fast bacilli & NTM negative culture. PCR tested for M chelonae.	Kröner C, Griese M, Kappler M, Schoen C, Hoffmann F, Nicolai T, Reiter K. Endobronchial lesions caused by nontuberculous mycobacteria in apparently healthy pediatric patients. Pediatr Infect Dis J. 2015 May;34(5):532-5. doi: 10.1097/INF.0000000000000606. PMID: 25478650.
28	F	India	M. chelonae	Ofloxacin, Clarithromycin	N	bronchoscopy and bronchoalveolar lavage secretions were sent for acid-fast bacilli smear and culture: smear for acidfast bacillus was positive	Sankar J, Piduru P. Atypical presentation of atypical organism. Indian Pediatr. 2007;44(2):151.
29	F	Saudi Arabia	M. fortuitum	Amikacin, Rifampicin, Prednisolone	Y	bronchoalveolar lavage, gram stain positive, cultured.	Annobil SH, Jamjoom GA, Bobo R, Iyengar J. Fatal lipoid pneumonia in an infant complicated by Mycobacterium fortuitum infection. Trop Geogr Med. 1992;44(1-2):160-164.
30	F	Israel	M. fortuitum	Clarithromycin	N	Thoracotomy, lung tissue culture	Glatstein M, Scolnik D, Bensira L, Domany KA, Shah M, Vala S. Lung abscess due to non-tuberculous, non-Mycobacterium fortuitum in a neonate. Pediatr Pulmonol. 2012 Oct;47(10):1034-7. doi: 10.1002/ppul.22558. Epub 2012 Mar 26. PMID: 22451300.
31	M	United States	M. fortuitum	Amikacin, Cefoxitin, Azithromycin, Trimethoprim-sulfamethoxazole (TMP/SMX), Meropenem, Ciprofloxacin, Imipenem	N	gastric aspirates and aerobic blood culture from a left internal jugular central venous catheter (CVC), acid fast bacilli (AFB) cultures.	Sharma D, Hilinski JA. Refractory pneumonia in a Mexican American infant. Clin Pediatr (Phila). 2010 Jul;49(7):710-2. doi: 10.1177/0009922808325462. Epub 2008 Oct 2. PMID: 18832546.
32	M	United States	M. fortuitum	Amikacin, Trimethoprim-sulfamethoxazole (TMP/SMX)	N	anterolateral thoracotomy and open lung biopsy	Paone RF, Mercer LC, Glass BA. Pneumonectomy secondary to Mycobacterium fortuitum in infancy. Ann Thorac Surg. 1991;51(6):1010-1011. doi:10.1016/0003-4975(91)91036-u
33	M	Mexico	M. fortuitum/chelonae	none- lost to follow up	-	PPD negative, BAL positive from surgical specimen	Ridaura-Sanz C, López-Corella E, Salazar-Flores M. Exogenous lipoid pneumonia superinfected with acid-fast bacilli in infants: a report of nine cases. Fetal Pediatr Pathol. 2006;25(2):107‐117. doi:10.1080/15513810600788798
34	F	United States	M. genavense	Azithromycin, Rifampicin, Moxifloxacin, Amikacin	N	Bronchoalveolar lavage (BAL), acid-fast staining of the BAL fluid revealed rare acid-fast bacilli; nucleic-acid amplification test for M. tb was negative. TST (8mm). interferon-γ release assay for M. tuberculosis was also negative	Holland SM, Pierce VM, Shailam R, Glomski K, Farmer JR. Case 28-2017. A 13-Month-Old Girl with Pneumonia and a 33-Year-Old Woman with Hip Pain. N Engl J Med. 2017 Sep 14;377(11):1077-1091. doi: 10.1056/NEJMcpc1706097. PMID: 28902581.
35	M	India	M. smegmatis	Streptomycin, Isoniazid, Rifampicin, Ethambutol	Y	Mantoux test was negative. Diagnostic BCG test as described by Udani et al 6 showed 8 x 8 mm reaction. Gastric examination for acid fast bacilli (AFB) was negative but within a week of the formation of culture on LJ medium, growth of AFB was seen. Paranitrobenzoic acid test positive, Niacin test negative and there was no growth on Mc Conkey agar.	Kumar KJ, Chandra J, Mandal RN, Dutta R, Jain NK. Fatal pulmonary infection caused by Mycobacterium smegmetis in an infant. Indian J Pediatr. 1995;62(5):619-621. doi:10.1007/BF02761893
36	F	Germany	unspecified mycobacterium: not M. tuberculosis or M. bovis	None	N	bronchoscopy, Acid fast bacilli were neither detected microscopically nor grown in culture, PCR positive for mycobacteria	Kröner C, Griese M, Kappler M, Schoen C, Hoffmann F, Nicolai T, Reiter K. Endobronchial lesions caused by nontuberculous mycobacteria in apparently healthy pediatric patients. Pediatr Infect Dis J. 2015 May;34(5):532-5. doi: 10.1097/INF.0000000000000606. PMID: 25478650.
37	F	United States	M. avium complex	isoniazid and rifampin	N	Bronchoscopy	Powell DA, Walker DH. Nontuberculous mycobacterial endobronchitis in children. J Pediatr. 1980 Feb;96(2):268-70. doi: 10.1016/s0022-3476(80)80822-5. PMID: 7351593.
